# Supplementary material for: Prediction and Visualization of Non-Enhancing Tumor in Glioblastoma via T1w/T2w-Ratio Map
Source: MDPI journal article supplement (doi:10.3390/brainsci12010099), 2022-01-12
Supplement: s1 [file s1]

# Prediction and visualization of non-enhancing tumor in glioblastoma via T1w/T2w-ratio map

Shota Yamamoto <sup>1,2</sup>, Takahiro Sanada <sup>1</sup>, Mio Sakai <sup>3</sup>, Atsuko Arisawa <sup>4</sup>, Naoki Kagawa <sup>2</sup>, Eku Shimosegawa <sup>5</sup>, Katsuyuki Nakanishi <sup>3</sup>, Yonehiro Kanemura <sup>6</sup>, Manabu Kinoshita <sup>1,2,7,\*</sup>, Haruhiko Kishima <sup>2</sup>

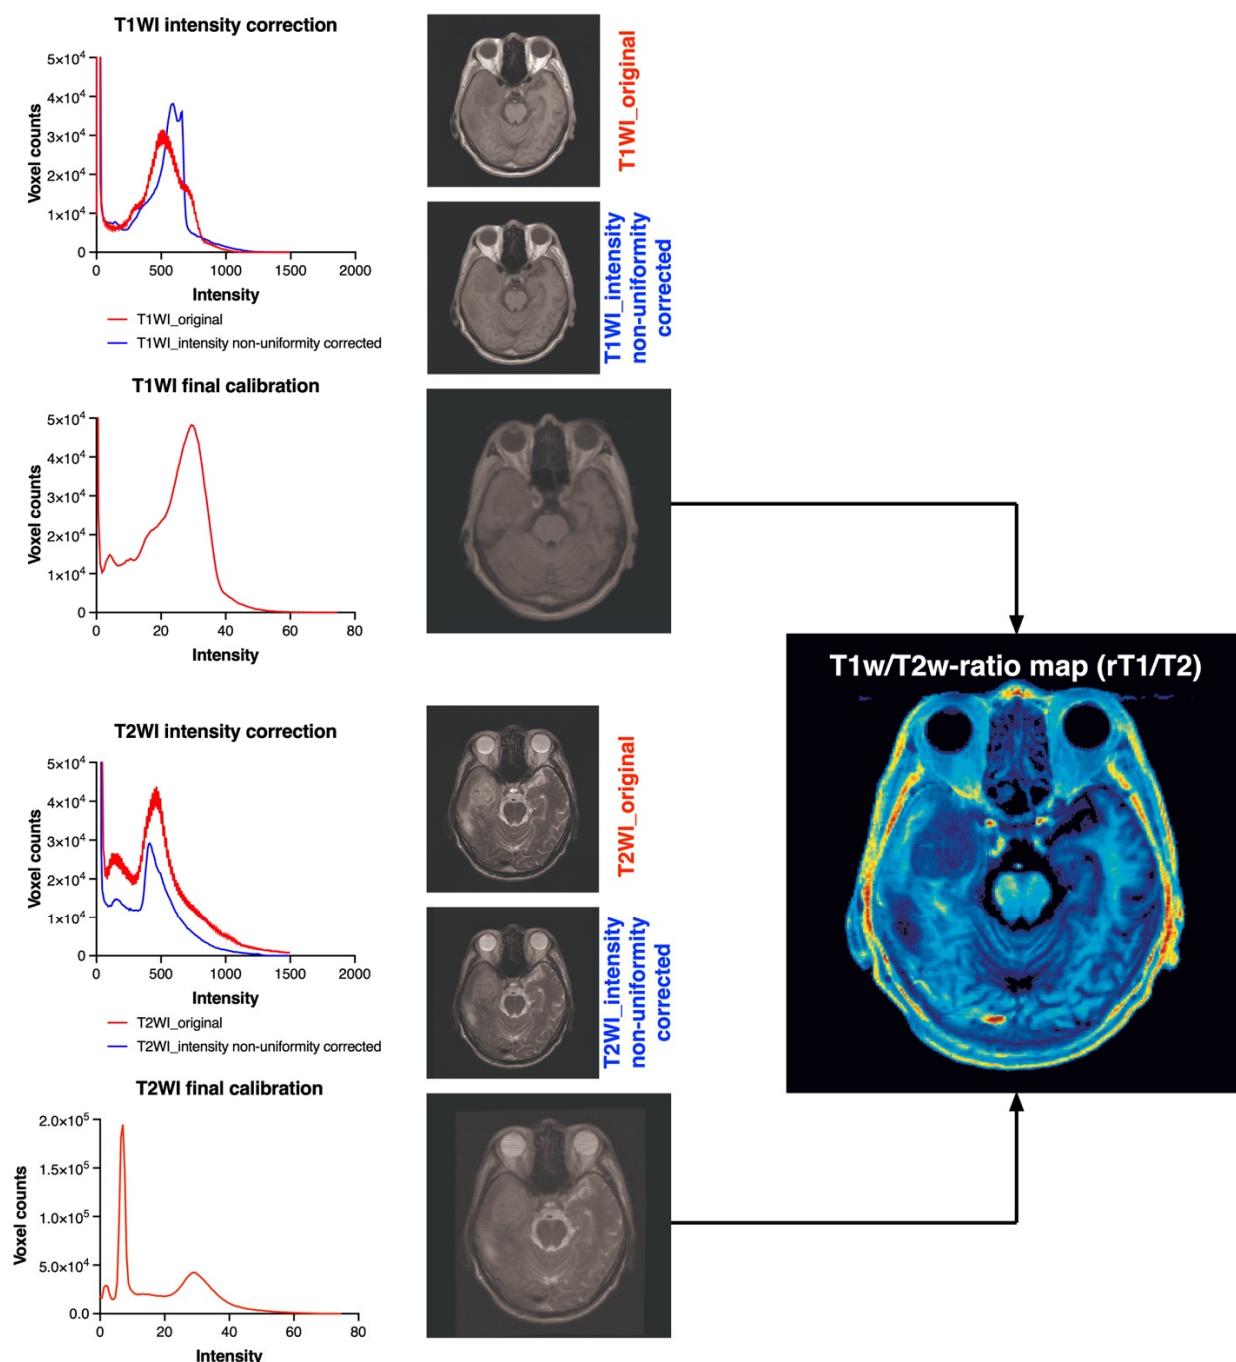

**Figure S1.** Image processing for T1w/T2w-ratio map (rT1/T2) reconstruction is presented. Both T1WI and T2WI were subjected to intensity non-uniformity correction and intensity normalization. T1w/T2w-ratio map (rT1/T2) was created by the finally calibrated and image intensity normalized T1- and T2WI. Further details can be found in the reference article 14 by Ganzetti et al [14].

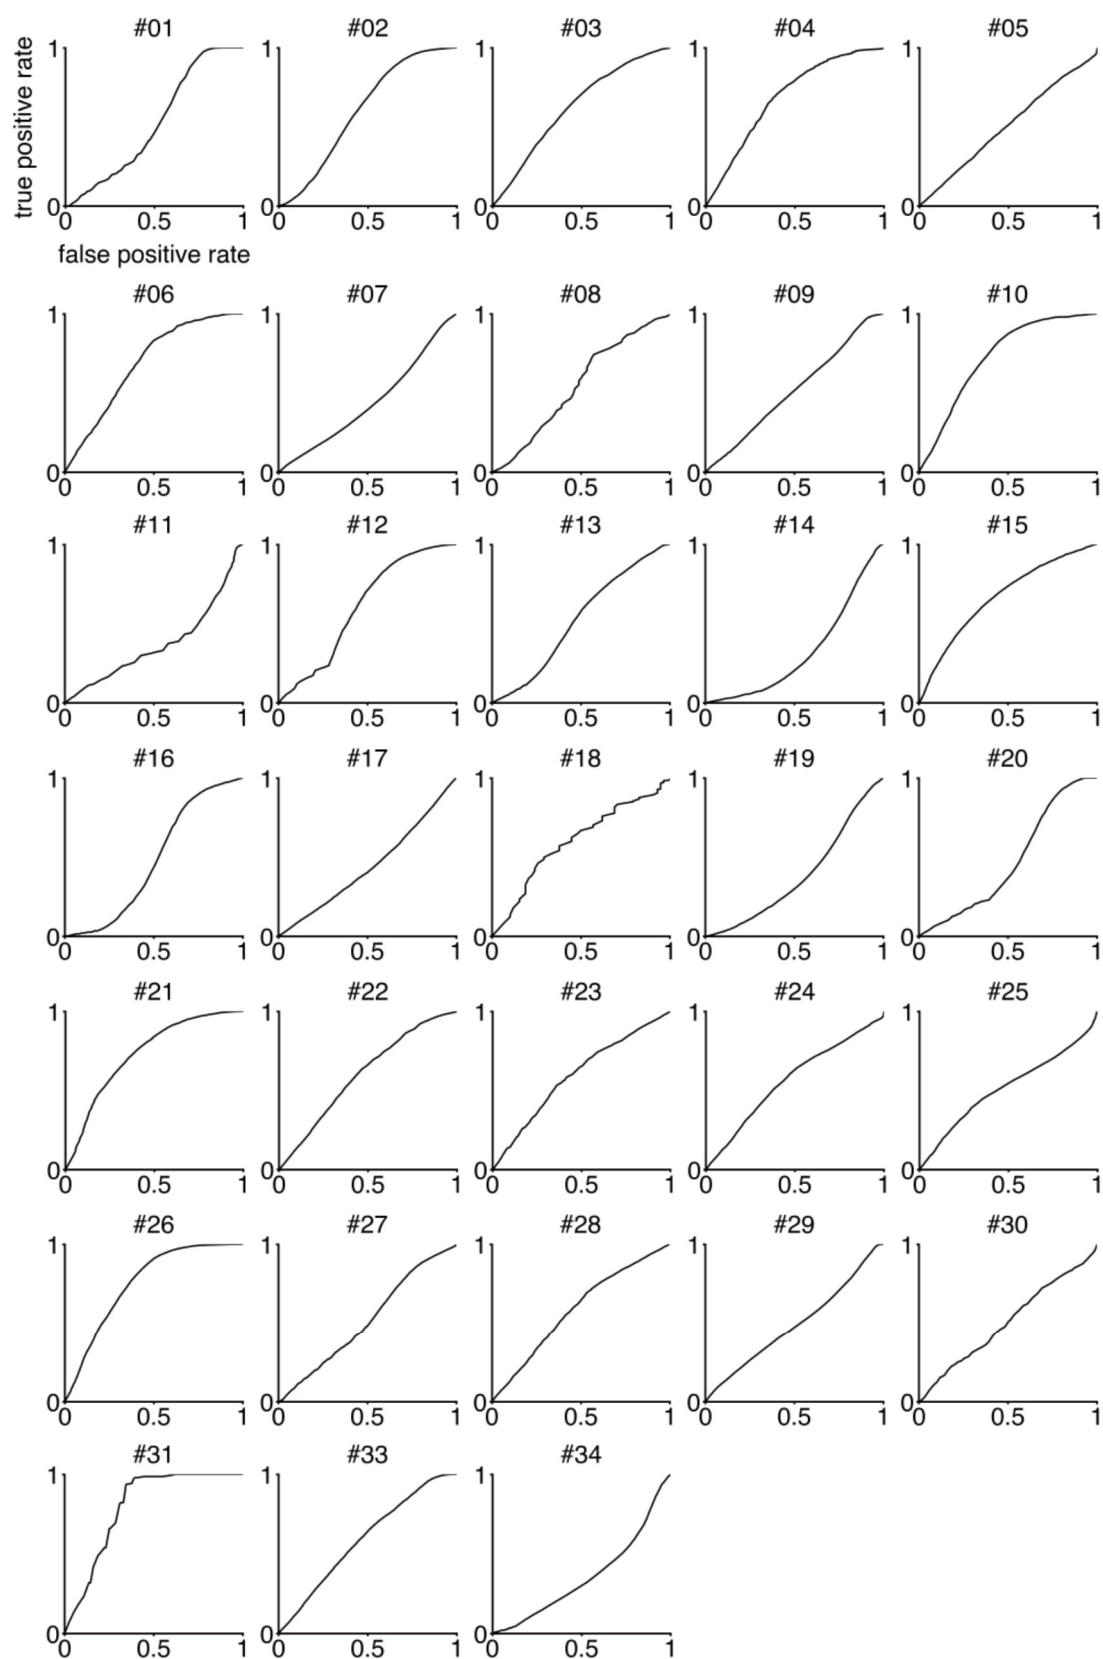

**Figure S2.** ROC curves of LMPH to detect Met-PET high for each case.

**Table S1.** Relationship between rT1/T2 and Likeliness of MET-PET high.

Numbers above black line indicate the range of rT1/T2 and below the line indicate the Likeliness of MET-PET high. Abbreviations: NaN, Not a number.

|              |               |               |               |               |               |               |               |               |              |
|--------------|---------------|---------------|---------------|---------------|---------------|---------------|---------------|---------------|--------------|
| 0.0-<br>0.01 | 0.01-<br>0.02 | 0.02-<br>0.03 | 0.03-<br>0.04 | 0.04-<br>0.05 | 0.05-<br>0.06 | 0.06-<br>0.07 | 0.07-<br>0.08 | 0.08-<br>0.09 | 0.09-<br>0.1 |
| NaN          | NaN           | NaN           | -1.000        | -1.000        | -1.000        | NaN           | -1.000        | -1.000        | -1.000       |
| 0.1-<br>0.11 | 0.11-<br>0.12 | 0.12-<br>0.13 | 0.13-<br>0.14 | 0.14-<br>0.15 | 0.15-<br>0.16 | 0.16-<br>0.17 | 0.17-<br>0.18 | 0.18-<br>0.19 | 0.19-<br>0.2 |
| -1.000       | -1.000        | NaN           | -1.000        | -1.000        | -1.000        | -1.000        | -1.000        | -0.705        | -1.000       |
| 0.2-<br>0.21 | 0.21-<br>0.22 | 0.22-<br>0.23 | 0.23-<br>0.24 | 0.24-<br>0.25 | 0.25-<br>0.26 | 0.26-<br>0.27 | 0.27-<br>0.28 | 0.28-<br>0.29 | 0.29-<br>0.3 |
| -1.000       | -0.770        | -0.891        | -0.908        | -0.831        | -0.936        | -0.948        | -0.872        | -0.680        | -0.643       |
| 0.3-<br>0.31 | 0.31-<br>0.32 | 0.32-<br>0.33 | 0.33-<br>0.34 | 0.34-<br>0.35 | 0.35-<br>0.36 | 0.36-<br>0.37 | 0.37-<br>0.38 | 0.38-<br>0.39 | 0.39-<br>0.4 |
| -0.549       | -0.705        | -0.584        | -0.662        | -0.590        | -0.564        | -0.626        | -0.632        | -0.654        | -0.688       |
| 0.4-<br>0.41 | 0.41-<br>0.42 | 0.42-<br>0.43 | 0.43-<br>0.44 | 0.44-<br>0.45 | 0.45-<br>0.46 | 0.46-<br>0.47 | 0.47-<br>0.48 | 0.48-<br>0.49 | 0.49-<br>0.5 |
| -0.643       | -0.655        | -0.649        | -0.689        | -0.657        | -0.621        | -0.618        | -0.584        | -0.578        | -0.510       |
| 0.5-<br>0.51 | 0.51-<br>0.52 | 0.52-<br>0.53 | 0.53-<br>0.54 | 0.54-<br>0.55 | 0.55-<br>0.56 | 0.56-<br>0.57 | 0.57-<br>0.58 | 0.58-<br>0.59 | 0.59-<br>0.6 |
| -0.490       | -0.429        | -0.376        | -0.354        | -0.301        | -0.271        | -0.226        | -0.216        | -0.190        | -0.162       |
| 0.6-<br>0.61 | 0.61-<br>0.62 | 0.62-<br>0.63 | 0.63-<br>0.64 | 0.64-<br>0.65 | 0.65-<br>0.66 | 0.66-<br>0.67 | 0.67-<br>0.68 | 0.68-<br>0.69 | 0.69-<br>0.7 |
| -0.142       | -0.120        | -0.103        | -0.105        | -0.099        | -0.087        | -0.071        | -0.068        | -0.048        | -0.019       |
| 0.7-<br>0.71 | 0.71-<br>0.72 | 0.72-<br>0.73 | 0.73-<br>0.74 | 0.74-<br>0.75 | 0.75-<br>0.76 | 0.76-<br>0.77 | 0.77-<br>0.78 | 0.78-<br>0.79 | 0.79-<br>0.8 |
| -0.014       | -0.004        | 0.016         | 0.015         | 0.029         | 0.026         | 0.040         | 0.031         | 0.035         | 0.028        |
| 0.8-<br>0.81 | 0.81-<br>0.82 | 0.82-<br>0.83 | 0.83-<br>0.84 | 0.84-<br>0.85 | 0.85-<br>0.86 | 0.86-<br>0.87 | 0.87-<br>0.88 | 0.88-<br>0.89 | 0.89-<br>0.9 |
| 0.041        | 0.041         | 0.049         | 0.067         | 0.086         | 0.094         | 0.112         | 0.129         | 0.145         | 0.163        |
| 0.9-<br>0.91 | 0.91-<br>0.92 | 0.92-<br>0.93 | 0.93-<br>0.94 | 0.94-<br>0.95 | 0.95-<br>0.96 | 0.96-<br>0.97 | 0.97-<br>0.98 | 0.98-<br>0.99 | 0.99-<br>1.0 |

|              |               |               |               |               |               |               |               |               |              |
|--------------|---------------|---------------|---------------|---------------|---------------|---------------|---------------|---------------|--------------|
| 0.179        | 0.183         | 0.176         | 0.165         | 0.158         | 0.160         | 0.144         | 0.128         | 0.121         | 0.108        |
| 1.0-<br>1.01 | 1.01-<br>1.02 | 1.02-<br>1.03 | 1.03-<br>1.04 | 1.04-<br>1.05 | 1.05-<br>1.06 | 1.06-<br>1.07 | 1.07-<br>1.08 | 1.08-<br>1.09 | 1.09-<br>1.1 |
| 0.102        | 0.103         | 0.124         | 0.143         | 0.123         | 0.160         | 0.161         | 0.174         | 0.140         | 0.113        |
| 1.1-<br>1.11 | 1.11-<br>1.12 | 1.12-<br>1.13 | 1.13-<br>1.14 | 1.14-<br>1.15 | 1.15-<br>1.16 | 1.16-<br>1.17 | 1.17-<br>1.18 | 1.18-<br>1.19 | 1.19-<br>1.2 |
| 0.124        | 0.143         | 0.102         | 0.139         | 0.152         | 0.122         | 0.088         | 0.102         | 0.072         | 0.019        |
| 1.2-<br>1.21 | 1.21-<br>1.22 | 1.22-<br>1.23 | 1.23-<br>1.24 | 1.24-<br>1.25 | 1.25-<br>1.26 | 1.26-<br>1.27 | 1.27-<br>1.28 | 1.28-<br>1.29 | 1.29-<br>1.3 |
| 0.014        | 0.044         | 0.095         | 0.183         | 0.109         | 0.119         | 0.166         | 0.206         | 0.221         | 0.119        |
| 1.3-<br>1.31 | 1.31-<br>1.32 | 1.32-<br>1.33 | 1.33-<br>1.34 | 1.34-<br>1.35 | 1.35-<br>1.36 | 1.36-<br>1.37 | 1.37-<br>1.38 | 1.38-<br>1.39 | 1.39-<br>1.4 |
| 0.109        | 0.062         | 0.139         | 0.116         | 0.199         | 0.146         | 0.201         | 0.181         | 0.185         | 0.177        |
| 1.4-<br>1.41 | 1.41-<br>1.42 | 1.42-<br>1.43 | 1.43-<br>1.44 | 1.44-<br>1.45 | 1.45-<br>1.46 | 1.46-<br>1.47 | 1.47-<br>1.48 | 1.48-<br>1.49 | 1.49-<br>1.5 |
| 0.249        | 0.237         | 0.397         | 0.004         | 0.218         | 0.256         | 0.249         | 0.243         | 0.382         | 0.218        |
| 1.5-<br>1.51 | 1.51-<br>1.52 | 1.52-<br>1.53 | 1.53-<br>1.54 | 1.54-<br>1.55 | 1.55-<br>1.56 | 1.56-<br>1.57 | 1.57-<br>1.58 | 1.58-<br>1.59 | 1.59-<br>1.6 |
| 0.470        | 0.871         | 0.218         | 0.019         | -1.000        | -0.486        | -1.000        | 0.019         | -0.092        | -1.000       |
| 1.6-<br>1.61 | 1.61-<br>1.62 | 1.62-<br>1.63 | 1.63-<br>1.64 | 1.64-<br>1.65 | 1.65-<br>1.66 | 1.66-<br>1.67 | 1.67-<br>1.68 | 1.68-<br>1.69 | 1.69-<br>1.7 |
| 1.000        | NaN           | NaN           | 0.724         | 1.000         | 0.350         | 0.019         | -1.000        | NaN           | 1.000        |
| 1.7-<br>1.71 | 1.71-<br>1.72 | 1.72-<br>1.73 | 1.73-<br>1.74 | 1.74-<br>1.75 | 1.75-<br>1.76 | 1.76-<br>1.77 | 1.77-<br>1.78 | 1.78-<br>1.79 | 1.79-<br>1.8 |
| 1.000        | 1.000         | NaN           | 1.000         | 1.000         | 1.000         | NaN           | NaN           | NaN           | 1.000        |
| 1.8-<br>1.81 | 1.81-<br>1.82 | 1.82-<br>1.83 | 1.83-<br>1.84 | 1.84-<br>1.85 | 1.85-<br>1.86 | 1.86-<br>1.87 |               |               |              |
| NaN          | -1.000        | -1.000        | NaN           | NaN           | NaN           | 1.000         |               |               |              |
